# Supplementary material for: Whole genome sequencing reveals candidate causal genetic variants for spastic syndrome in Holstein cattle
Source: Sci Rep. 2024 Dec 28;14:31188. doi: 10.1038/s41598-024-82446-z (PMC11682090; doi:10.1038/s41598-024-82446-z)
Supplement: Supplementary file 5 — Supplementary Material 5 [file 41598_2024_82446_MOESM5_ESM.xlsx]

## Sheet: Froh_holstein_300kb
Supplementary file 5: Genomic inbreeding coefficient in the seven spastic syndrome cases
Lab ID	Case ID	Ggroup	Sum	Froh_genome
RM2815	Case 1	HOL	489357764	0.186259
RM2817	Case 2	HOL	443918752	0.168964
RM2821	Case 3	HOL	350470835	0.133396
RM2824	Case 4	HOL	159282062	0.0606259
RM2833	Case 5	HOL	480094057	0.182733
RM4725	Case 6	HOL	415333593	0.158084
SS013	Case 7	HOL	414108696	0.157618
